# 1 Coarse-grained implicit solvent lipid force field with a compatible 2 resolution to the $\text{Ca}$ protein representation

3  
4 Diego Ugarte La Torre<sup>1</sup> and Shoji Takada<sup>1</sup>

5 <sup>1</sup>Department of Biophysics, Graduate School of Science, Kyoto University, Kyoto, Japan

6  
7 Keywords: coarse-grained model, implicit solvent, molecular dynamics, lipid membrane, iSoLF,  
8 CafeMol

## 9 10 **Abstract**

11  
12 Biological membranes have been prominent targets for coarse-grained (CG) molecular dynamics (MD)  
13 simulations. While minimal CG lipid models with three-beads per lipid and quantitative CG lipid  
14 models with >10-beads per lipid have been well studied, in between them, CG lipid models with a  
15 compatible resolution to residue-level CG protein models are much less developed. Here, we extended  
16 a previously developed three-bead lipid model into a five-bead model and parametrized it for two  
17 phospholipids, POPC and DPPC. The developed model, iSoLF, reproduced the area per lipid,  
18 hydrophobic thickness, and phase behaviors of the target phospholipid bilayer membranes at the  
19 physiological temperature. The model POPC and DPPC membranes were in liquid and gel phases,  
20 respectively, in accordance with experiments. We further examined the spontaneous formation of a  
21 membrane bilayer, the temperature dependence of physical properties, vesicle dynamics, and the  
22 POPC/DPPC two-component membrane dynamics of the CG lipid model, showing some promise.  
23 Once combined with standard  $\text{Ca}$  protein models, the iSoLF model will be a powerful tool to simulate  
24 large biological membrane systems made of lipids and proteins.  
25

## 26 Introduction

27 While molecular dynamics (MD) simulations have been indispensable tools to study the structural  
28 dynamics of biomolecular systems, the time scale attainable by all-atom MD simulations poses one of  
29 the major challenges for many biological phenomena.<sup>1-3</sup> To overcome this limitation, coarse-grained  
30 (CG) modeling reduces the number of degrees of freedom by grouping atoms into CG beads, effectively  
31 decreasing the computational cost of simulations while retaining the properties of interest as much as  
32 possible.<sup>5-6</sup> Due to the hierarchic nature of biomolecular systems, there are several different resolutions  
33 of coarse-graining. In general, higher resolution CG models are more accurate but computationally  
34 more expensive. Thus, depending on the purpose, one can choose the best CG model, among others.  
35 For example, CG models that explicitly represent solvent molecules are relatively accurate, while  
36 implicit solvent CG models are considerably faster by incorporating the average effects of solvents  
37 directly into CG force fields of solute molecules.<sup>7</sup>

38 Biological membranes are prominent targets of CG MD simulations, for which different classes  
39 of CG lipid models have been developed for two decades. In 1998, Goetz and Lipowsky developed an  
40 explicit solvent CG amphiphile model and successfully simulated self-assembly of a bilayer  
41 membrane.<sup>8</sup> Some years later, Noguchi and Takasu were the first to make an implicit solvent CG model  
42 of amphiphiles that exhibit proper physical behaviors of a bilayer membrane.<sup>9</sup> Later, Cooke et al.  
43 developed a much simpler pairwise-interacting implicit solvent CG model for lipids.<sup>10</sup> Both of these  
44 implicit solvent models use three CG beads per lipid, making them minimal and generic, without  
45 requiring the parameterization for any specific molecule. These minimal models were successfully  
46 applied to uncover many physical aspects of membrane systems, such as the gel-liquid phase transition,  
47 phase separation, membrane fusion, and budding. As a different class of models, several higher-  
48 resolution CG lipid models were developed, including the seminal work of MARTINI by Marrink et al.  
49 in 2004.<sup>11-18</sup> This class of models uses more than 10 CG beads per lipid and represent the two-alkyl-tail  
50 geometry explicitly, making the model specific to individual phospholipids. Among others, the  
51 MARTINI model has been successfully applied to many targets.<sup>19-22</sup> Most of these models, with some  
52 exceptions<sup>13,17,23</sup>, use explicit solvent molecules, making them computationally demanding compared  
53 to the above-mentioned minimal models.

54 Notably, most biological membrane systems of interest contain membrane proteins as well.  
55 Thus, to be able to apply CG lipid models to many of these biological systems, its compatibility with  
56 CG protein models is of crucial importance. In particular, to model physicochemical interactions  
57 between lipids and proteins naturally, it is highly desired that both the CG lipid and protein  
58 representations share a similar resolution. The MARTINI force field, for example, consistently uses a  
59 mapping of one CG particle for about four non-hydrogen atoms for lipids, proteins, and other molecules.  
60 Among many CG models for proteins, a classic and still very popular representation is to use one CG  
61 particle per amino acid, most frequently placing the CG particle at its C $\alpha$  position<sup>24-28</sup>. Amino acids in

62 proteins contain  $8.4 \pm 2.4$  non-hydrogen atoms (the average over 20 amino acids  $\pm$  the standard  
63 deviation). Therefore, with this resolution, one can roughly reduce the degree of freedom by one order  
64 of magnitude. Representative phospholipids, for example, POPC (1-palmitoyl-2-oleoyl-sn-glycero-3-  
65 phosphocholine) and DPPC (1,2-dipalmitoyl-sn-glycero-3-phosphatidylcholine), contain 52 and 50  
66 non-hydrogen atoms, respectively. We thus regard the use of 5-6 CG particles for each lipid molecule  
67 to be compatible with the  $C\alpha$  protein representation. However, among the several CG lipid models with  
68 an intermediate resolution in between three-beads per lipid and MARTINI-like models<sup>29-35</sup>, there are  
69 few CG models with a 5-6 CG particles per lipid resolution. In fact, the purpose of this paper is to  
70 present a new and relatively simple CG lipid force field with a compatible resolution to  $C\alpha$  protein  
71 models, where we represent each lipid with five CG beads to reduce the computational cost.

72 With the use of five CG beads, our aim is not to model generic lipid molecules but to  
73 parametrize the model for specific phospholipid molecules. In particular, we parametrize our CG lipid  
74 model for the POPC and the DPPC lipids. POPC and DPPC are unsaturated and saturated  
75 phospholipids, respectively. It is well-known that near-physiological temperatures (30 °C for example),  
76 pure POPC lipid membranes are in the liquid disordered phase, while pure DPPC lipid membranes are  
77 in the gel phase.<sup>36,37</sup> More generally, at physiological conditions, pure unsaturated phospholipid  
78 membranes are in the liquid disordered phase, while pure saturated phospholipid membranes are in the  
79 gel phase. Reproducing these two phases should be important for simulations of biological membranes,  
80 which are a mixture of unsaturated and saturated phospholipids, in addition to membrane proteins and  
81 others. We also note that, with a five CG bead representation, we give up the two-tailed branched-chain  
82 geometry and, instead, use a linear chain (notably, it is not impossible to take two-tailed chain geometry  
83 with six beads per lipid resolution, as was recently proposed in an elegant work<sup>34</sup>). The linear chain  
84 representation of lipids makes it particularly challenging to distinguish between the unsaturated and  
85 saturated lipids because the unsaturated tail tends to bend and separate from the other tail.

86 In this work, we develop our CG implicit solvent lipid model by extending the work of Cooke,  
87 Kremer, and Deserno<sup>10</sup>, representing each lipid molecule with five CG beads so that it has a compatible  
88 resolution to  $C\alpha$  protein models. The Method section describes the CG model, including its mapping to  
89 all-atom structures and the potential energy function, as well as CG and all-atom MD simulation details.  
90 The Results and Discussion section begins with the parametrization of the force field for the two target  
91 lipids, POPC and DPPC. Then we report simulation results of spontaneous bilayer membrane  
92 formation, 2D diffusion of lipids, vesicle dynamics, the temperature dependence of membrane  
93 properties, and the POPC/DPPC two-component membrane dynamics. Finally, we discuss the  
94 limitation and future directions.

95

## 96 **Methods**

### 97 **Lipid model**

98 In our CG model, a two-tailed glycerophospholipid is represented as a linear chain molecule (**Fig. 1a**).  
 99 Each CG lipid molecule is composed of five beads, two polar head beads (H1 and H2), and three  
 100 hydrophobic tail beads (T1, T2, and T3). The H1 bead represents the terminal group bonded to the  
 101 phosphate, and the H2 bead corresponds to the phosphate, glycerol, and ester carbonyls. The T1, T2,  
 102 and T3 beads represent the first five carbon atoms of each tail, the next five carbon atoms of each tail,  
 103 and the remaining carbon atoms, respectively. As mentioned, this five-bead mapping produces a similar  
 104 resolution to  $\text{C}\alpha$  protein models.

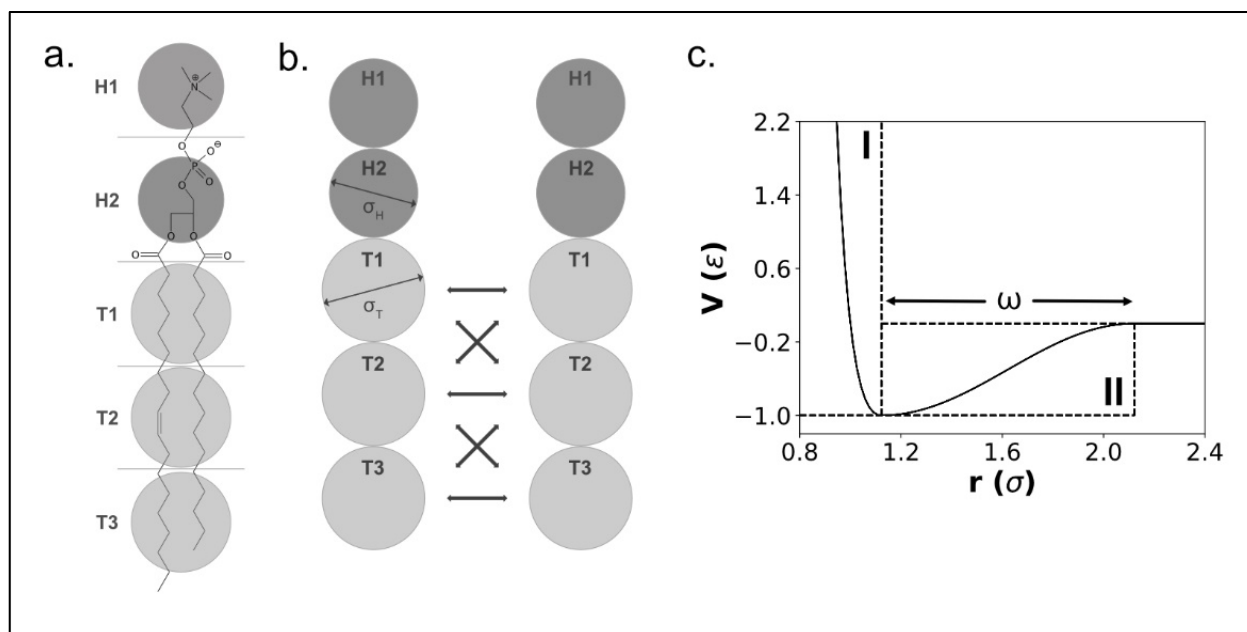

105  
 106 **Figure 1.** The current CG lipid model. (a) Mapping of glycerophospholipids, POPC as an example, into  
 107 a linear chain of five CG beads composed of two polar head beads (H1 and H2), and three hydrophobic  
 108 tail beads (T1, T2, and T3). The horizontal lines indicate the boundaries that define the assignment of  
 109 atoms into CG beads. (b) Schematic picture of intermolecular interactions. The thick double-headed  
 110 arrows indicate attractive interactions between hydrophobic tail CG particles. Notably, no attraction is  
 111 applied between the T1 and T3 beads. Repulsion between any pairs is applied based on the bead  
 112 diameter,  $\sigma_H$  for the head, and  $\sigma_T$ , for the tail. (c) The potential function between tail CG beads (except  
 113 T1-T3 pairs) in the unit of the scaling parameters  $\sigma$  and  $\epsilon^{10}$ . The regions I and II represent the repulsive  
 114 and attractive parts, respectively. The width of the attractive part is controlled by the parameter  $\omega$ .

115

116 In our CG force field, the potential energy function has four terms:

117

$$118 \quad V = V_{Bond} + V_{Angle} + V_{Repulsion} + V_{Attraction} \quad (1)$$

119

120 The first term,  $V_{Bond}$ , represents the virtual bond interactions between two adjacent CG beads belonging  
 121 to the same lipid molecule and is modeled by the harmonic potential:

122

$$V_{Bond} = \sum_{i=1}^{n_{bonds}} k_{bond,i} (b_i - b_{0,i})^2 \quad (2)$$

124

125 Here,  $k_{bond,i}$  is the force constant,  $b_i$  is the  $i$ -th virtual bond length between consecutive CG beads,  $b_{0,i}$   
 126 is the equilibrium value for the virtual bond, and  $n_{bonds}$  is the total number of virtual bonds. The  
 127 second term,  $V_{Angle}$ , is the potential for the virtual bond-angle between two consecutive virtual bonds  
 128 in a lipid molecule and is modeled by the harmonic potential:

129

$$V_{Angle} = \sum_{i=1}^{n_{angles}} k_{angle,i} (\theta_i - \theta_{0,i})^2 \quad (3)$$

131

132 Here,  $k_{angle,i}$  is the force constant,  $\theta_i$  is the angle between two consecutive bonds,  $\theta_{0,i}$  is the  
 133 equilibrium value for the  $i$ -th angle, and  $n_{angles}$  is the total number of angles. We note that the dihedral-  
 134 angle potential used in all-atom force fields is not included in our model because the  $\theta_{0,i}$  in eq.(3) turn  
 135 out to be close to  $\pi$  (see Table 1, below), which makes the dihedral potential near divergent.

136 The two remaining terms of the force field represent the interaction between two lipid  
 137 molecules. These terms have the same functional form as the ones described in the work of Cooke,  
 138 Kremer, and Deserno<sup>10</sup>. The repulsive term,  $V_{Repulsion}$ , is modeled with the Weeks-Chandler-Andersen  
 139 potential:

140

$$V_{Repulsion} = \sum_{i < j}^{n_{nl-pairs}} \begin{cases} 4\varepsilon_{ij} \left[ \left( \frac{\sigma_{ij}}{r_{ij}} \right)^{12} - \left( \frac{\sigma_{ij}}{r_{ij}} \right)^6 + \frac{1}{4} \right], & r_{ij} \leq \sqrt[6]{2}\sigma_{ij} \\ 0, & r_{ij} > \sqrt[6]{2}\sigma_{ij} \end{cases} \quad (4)$$

142

143 with  $\varepsilon_{ij}$  representing the force scaling factor,  $\sigma_{ij}$  the repulsive range for the  $ij$  pair of beads, and  
 144  $n_{nl-pairs}$  the total number of non-local pairs of CG beads. This repulsive interaction is applied to all  
 145 the pairs of beads that are not participating in a virtual bond or a bond-angle interaction. The value of  
 146  $\sigma_{ij}$  is defined as the arithmetic mean  $(\sigma_i + \sigma_j)/2$  where  $\sigma_i$  ( $\sigma_j$ ) represents the van der Waals diameter  
 147 of the  $i$ -th ( $j$ -th) CG particle. For each lipid type,  $\sigma_i$  takes two values;  $\sigma_H$  for the head and  $\sigma_T$  for the tail  
 148 beads, with values related by  $\sigma_H = 0.65\sigma_T$  (**Fig. 1b**). This relation confers the lipids a geometry that  
 149 prevents the formation of persistent holes in membranes, which we will discuss later in this paper. The  
 150 value of  $\varepsilon_{ij}$  is defined as the geometric mean,  $\varepsilon_{ij} = \sqrt{\varepsilon_i \varepsilon_j}$ , where  $\varepsilon_i$  depends on the lipid type. Finally,  
 151 in the last term,  $V_{Attraction}$ , represents the attractive hydrophobic interaction between tail beads of  
 152 different lipid molecules:

153

$$V_{Attraction} = \sum_{i < j}^{n_{nl-pairs}} \begin{cases} -\varepsilon_{ij}, & r_{ij} \leq \sqrt[6]{2}\sigma_{ij} \\ -\varepsilon_{ij} \cos^2 \left[ \frac{\pi}{2\omega_{ij}} (r_{ij} - \sqrt[6]{2}\sigma_{ij}) \right], & \sqrt[6]{2}\sigma_{ij} < r_{ij} \leq \sqrt[6]{2}\sigma_{ij} + \omega_{ij} \\ 0, & \sqrt[6]{2}\sigma_{ij} + \omega_{ij} < r_{ij} \end{cases} \quad (5)$$

155

156 Here,  $\varepsilon_{ij}$  and  $\sigma_{ij}$  have the same values as in the repulsive potential, whereas  $\omega_{ij}$  represents the width  
157 of the pair potential well, which is defined as the arithmetic mean of each lipid type,  $(\omega_i + \omega_j)/2$ . The  
158 attractive interaction, which approximates the hydrophobic interaction, is only applied between tail  
159 bead pairs, excluding the T1-T3 pairs (**Fig. 1b**). This exclusion of the T1-T3 pairs was motivated to  
160 prevent the system from getting trapped into a highly rough membrane surface, and unrealistic collapsed  
161 local minima. **Fig. 1c** shows the potential that represents the interaction between tail bead pairs that  
162 participate in both repulsive and attractive interactions. In our preliminary tests, an attractive potential  
163 between head beads occasionally resulted in the inverted micelle form for simulations starting from  
164 random configurations. To avoid this configuration, we do not include the attraction between head  
165 beads in the current model. However, a weak and fine-tuned attractive force could be useful in the  
166 future.

167 We call the current CG lipid models as the *implicit solvent lipid force field*, iSoLF.

168

## 169 Coarse-grained molecular dynamics simulation

170 We performed all the CG MD simulations using a modified version of our software, CafeMol v3.1.<sup>38</sup>  
171 We used the standard underdamped Langevin equation and set the mass of each CG bead equal to the  
172 sum of the masses of atoms involved in the CG bead.

173 For the force-field parameter optimization, the estimate of physical properties of plane-  
174 membrane, their temperature dependence, the observation of pore formation, and the observation of the  
175 POPC/DPPC two-component membrane behavior, we used periodic boundary conditions and semi-  
176 isotropic pressure coupling in the xy-direction by fixing the linear length in the z-axis and allowing the  
177 linear lengths in the x- and y-axes to change while maintaining the surface tension equal to zero, i.e.,  
178 the  $N\gamma_{xy}L_zT$  ensemble where  $\gamma_{xy}$  means surface tension in xy-direction and  $L_z$  stands for the linear length  
179 in the z-direction. For the integrator, we used the one developed by Gao, Fang, and Wang.<sup>39</sup> The friction  
180 coefficient of the thermostat in the Langevin dynamics was set equal to 0.1 (1/CafeMol-time. In  
181 CafeMol v3.1, one CafeMol-time unit apparently corresponds to  $\sim 49$  fs although effective dynamics  
182 is much accelerated.)<sup>38</sup>, the friction coefficient of the barostat equal to 0.1 (1/CafeMol-time), and the  
183 compressibility of the simulation box equal to 0.01 ( $\text{\AA}^3 \cdot \text{mol}/\text{kcal}$ ). The MD time-step size in the  
184 integration was 0.2 (CafeMol-time) for simulations of pure POPC system, and 0.1 for simulations  
185 containing DPPC (we found the DPPC-containing system unstable with a time-step of 0.2, probably  
186 due to a small harmonic force constant and a large bond length of T2-T3 bonds). For the parameter

187 optimization process, each simulation consists of  $1 \times 10^6$  and  $2 \times 10^6$  MD steps for POPC and DPPC,  
188 respectively, of which the second half data were used for the estimation of the properties. For the  
189 temperature dependence examination, each simulation contains  $1.2 \times 10^6$  and  $2.4 \times 10^6$  MD steps for  
190 POPC and DPPC systems, respectively, from which the first sixth of data was discarded (sample  
191 trajectories are in **Fig. S1**). For the POPC/DPPC two-component system, the simulation contains  $2.4 \times$   
192  $10^6$  MD steps.

193 For the spontaneous lipid bilayer membrane formation and the vesicle simulation, we used the  
194 default dynamics setup of CafeMol, a fixed-size box with periodic boundary conditions, the NVT  
195 ensemble, and  $2 \times 10^6$  and  $1 \times 10^6$  MD steps, respectively.

196 For the simulation of the spontaneous lipid bilayer membrane formation, we prepared the initial  
197 configuration by sequentially placing lipid molecules inside a simulation box. The placement procedure  
198 of lipids consisted of selecting a random point where an H1 head bead was positioned. Then, the  
199 remaining beads (H2, T1, T2, and T3) were added following a randomly oriented straight line. During  
200 the placement of a lipid molecule, if any of its beads happened to be at a distance lower than  $1.3\sigma$  to  
201 any of the already placed beads, the molecule was discarded, and the placement of the H1 bead was  
202 performed again.

203 For the simulation of a vesicle made of POPC lipids, we prepared an initial configuration based  
204 on a simple geometric method. We set the radius of the vesicle as 15 nm (more precisely, the radius is  
205 defined as the distance from the center to the outer layer of the vesicle). Using the surface area of each  
206 leaflet and the area per lipid, we estimated the number of lipids in the inner- and outer- leaflets as 2976  
207 and 4400, respectively. Then, we used an algorithm that distributes points optimally on the surface of a  
208 sphere as evenly as possible, via mapping the Fibonacci lattice onto the surface<sup>40</sup>, by which we placed  
209 each lipid molecule.

210 We implemented our lipid model, iSoLF, in our software, CafeMol, and it will be included in  
211 the upcoming release.

212

### 213 **All-atom molecular dynamics simulations**

214 For the bottom-up parameter determination and calculation of reference physical properties, we  
215 performed all-atom MD simulation using GROMACS<sup>41</sup> version 5.1.1, the Slipids<sup>42,43</sup> force field for  
216 lipids, and the TIP3P water model.<sup>44</sup> We downloaded single-component membrane patches of 128  
217 POPC and DPPC lipids (64 lipids per leaflet) from the Slipids website<sup>45</sup> and performed energy  
218 minimization using the steepest descent method, NVT equilibration for 200 *ps* at a constant  
219 temperature of 303K using the v-rescale thermostat, and NPT equilibration for 5 *ns* at a constant  
220 pressure of 1.013 bar and a constant temperature of 303K using the Parrinello-Rahman barostat. In both  
221 equilibrations, lipid and water molecules were coupled separately, using time constants of 0.5ps and

222 10ps for the thermostat and barostat, respectively. Then, we performed production runs for 200 ns using  
223 the equilibrated patches, of which data was used for the estimates.

224 Finally, for the running-time comparison of the CG and all-atom models, we equilibrated all-  
225 atom and CG membrane patches of POPC following the protocol described above and performed  
226 production runs to estimate 2D MSD using 1 CPU core of an Intel i7-5930K processor and no GPUs.

227

## 228 **Calculations of properties**

229 In the planar membrane simulations, we calculated the area per lipid, the order parameter, the  
230 hydrophobic thickness, and the 2D diffusion coefficient. The area per lipid,  $A_L$ , was calculated by the  
231 formula:

232

$$233 \quad A_L = 2 \frac{A_{xy}}{n_{lipids}} \quad (6)$$

234

235 where  $A_{xy}$  is the area of the simulation box in the xy-plane and  $n_{lipids}$  is the total number of lipids in  
236 the system.

237 The order parameter,  $S_\theta$ , was calculated from the angle  $\theta_i$  formed between the line joining the  
238 center of mass of the tail beads T1 and T3, and the z-axis (**Fig. 2a**). We used this angle in the formula:

239

$$240 \quad \langle S_\theta(t) \rangle = \frac{1}{n_{lipids}} \sum_{i=1}^{n_{lipids}} \frac{1}{2} [3 \cos^2(\theta_i(t)) - 1] \quad (7)$$

241

242 where  $n_{lipids}$  is the total number of lipids in the system, and  $\langle \dots \rangle$  represents the average over all lipids.

243 For the hydrophobic thickness, we employed a similar method to the one used in the GridMAT-  
244 MD<sup>46</sup> software. For each lipid molecule, we choose the middle point of the H2-T1 pair as a reference  
245 point. Then, we find the lipid molecule in the opposite leaflet, which has the smallest distance in the  
246 xy-plane. The difference in the z-axis between the reference points defines the hydrophobic thickness  
247 at that lipid site. Once it is averaged over all lipids, we obtain the hydrophobic thickness (**Fig. 2b**).

248 The 2D diffusion coefficient, i.e., the lateral diffusion coefficient, was calculated from the mean  
249 square displacement (MSD), defined as  $MSD = \langle (r_{i,xy}(t + t_0) - r_{i,xy}(t_0))^2 \rangle$ , where  $r_{i,xy}$  is the xy  
250 coordinate of the center of mass of the i-th lipid molecule,  $t$  is the size of the time window, and  $t_0$  is  
251 the separation between time windows. The MSD as a function of the time window  $t$  is fitted by a straight  
252 line of which the slope is equal to 4 times the 2D diffusion coefficient. Also, for a given  $t$ , we set the  
253 interval of  $t_0$  larger than  $t$ .<sup>47</sup>

254



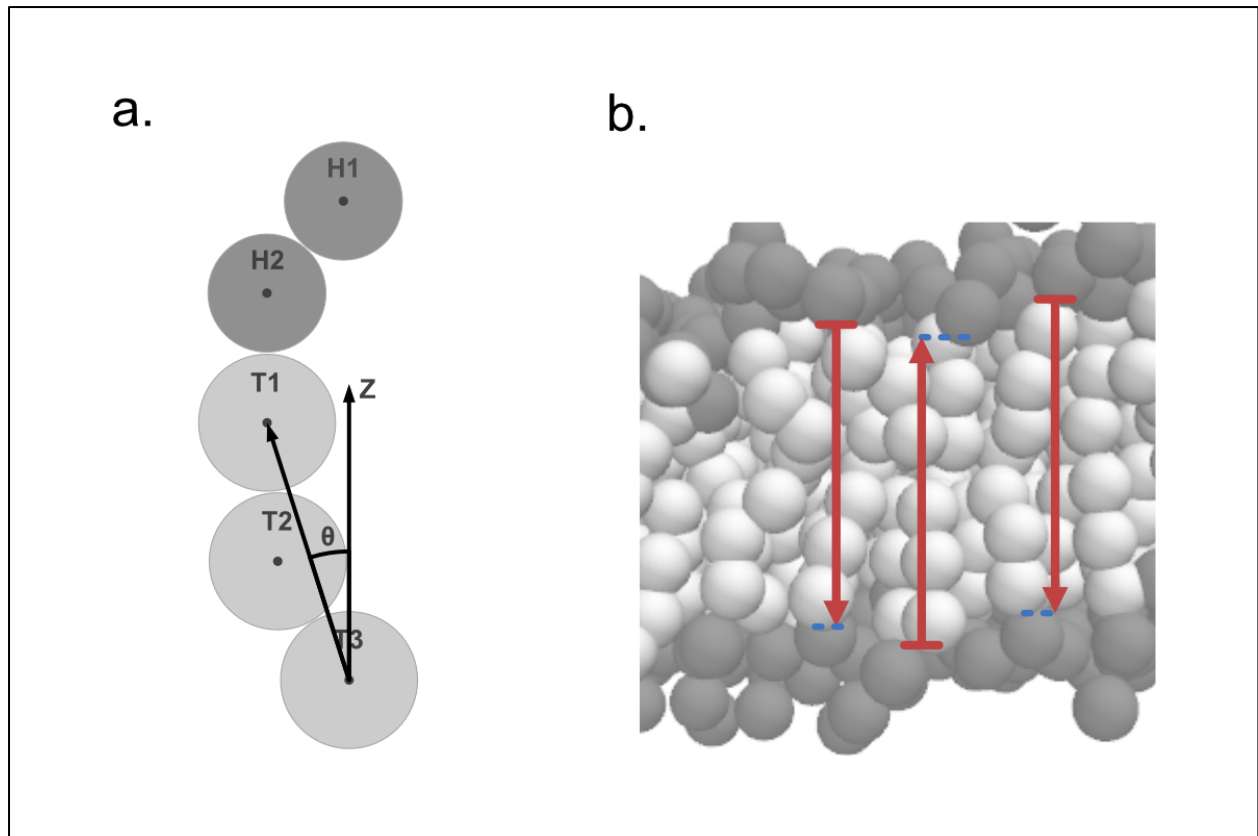

255

256 **Figure 2.** Methods for calculating the order parameter and the hydrophobic thickness. (a) Drawing of  
257 the angle  $\theta$  for the calculation of the order parameter. It is defined as the angle between the line joining  
258 the bead T1 and T3, and the z-axis. (b) The local hydrophobic thickness for three lipids. For each lipid  
259 molecule, we find a lipid molecule in the opposite leaflet such that the distance in xy-plane between the  
260 two lipids is the smallest (blue dashed lines). The difference in the z-axis between the pair of lipids  
261 (indicated by red arrows) defines the hydrophobic thickness at that site.

262

263 Finally, in this study, we used the physical properties described above to assign a phase to each  
264 of the simulated lipid bilayers. The gel phase was characterized by markedly slower lateral diffusion of  
265 lipids and a high order parameter. Faster lateral diffusion of lipids corresponded to the liquid phase, in  
266 which the liquid disordered and the liquid ordered phases were characterized by a low and high order  
267 parameter, respectively. As a function of temperature, we monitored the lateral diffusion coefficient,  
268 the order parameter, as well as the hydrophobic thickness and the area per lipid. For each lipid  
269 membrane, we found significant changes in all these properties nearly around a temperature, which we  
270 identified as the phase transition temperature. The thresholds for the slower/faster lateral diffusion and  
271 the lower/higher order parameter are defined by the corresponding values at the phase transition  
272 temperature.

273

274 **Results and Discussion**

## 275 Model Parameterization

276 Parameters in the force field were determined for two target glycerophospholipids, POPC (1-palmitoyl-  
 277 2-oleoyl-sn-glycero-3-phosphocholine) and DPPC (1,2-dipalmitoyl-sn-glycero-3-phosphatidylcholine).  
 278 It has been characterized that near-physiological temperature (30 °C) single-component membranes of  
 279 POPC and DPPC lipids exhibit liquid disordered and gel phases, respectively. Thus, these two lipids  
 280 can serve as representatives of the gel and liquid disordered phases of lipid membranes. In the parameter  
 281 determination, we used a partly bottom-up and partly top-down approach.

282

283 For the virtual-bond and bond-angle potential parameters, we took a bottom-up approach. We  
 284 first performed all-atom simulations of single-component lipid membranes of POPC and DPPC (see  
 285 the section "All-atom molecular dynamics simulations"). From the obtained structure ensembles, we  
 286 fitted Eq. (2) and Eq. (3) using the standard Boltzmann inversion method.<sup>48</sup> The obtained parameters  
 287 are listed in Table 1. It should be noted that we solely used lipid structural samples in the bilayer  
 288 membrane. Thus, we expect the obtained lipid parameters are appropriate for lipids in the membrane,  
 289 but not necessarily for those out of membranes.

290

| Type  | Coefficient           | POPC  | DPPC  |
|-------|-----------------------|-------|-------|
| Bond  | $k_{H1-H2}$           | 0.446 | 0.471 |
|       | $k_{H2-T1}$           | 1.073 | 1.320 |
|       | $k_{T1-T2}$           | 1.001 | 0.875 |
|       | $k_{T2-T3}$           | 0.443 | 0.280 |
|       | $b_{0,H1-H2}$         | 5.580 | 5.417 |
|       | $b_{0,H2-T1}$         | 5.452 | 5.824 |
|       | $b_{0,T1-T2}$         | 5.050 | 6.312 |
|       | $b_{0,T2-T3}$         | 5.095 | 6.299 |
| Angle | $k_{H1-H2-T1}$        | 0.600 | 0.582 |
|       | $k_{H2-T1-T2}$        | 2.383 | 3.357 |
|       | $k_{T1-T2-T3}$        | 0.880 | 4.823 |
|       | $\theta_{0,H1-H2-T1}$ | 3.142 | 3.142 |
|       | $\theta_{0,H2-T1-T2}$ | 3.142 | 3.142 |
|       | $\theta_{0,T1-T2-T3}$ | 3.142 | 3.142 |

291 **Table 1.** Parameters for the virtual bond and bond-angle potentials of POPC and DPPC. The force  
 292 coefficients  $k$  are in  $kcal/\text{\AA}^2mol$  for the virtual bond, and in  $kcal/mol$  for the virtual bond-angle, the  
 293 equilibrium distances  $b_0$  are in  $\text{\AA}$ , and the equilibrium angles  $\theta_0$  are in radians.

294  
295  
296  
297  
298  
299

For the parameterization of the intermolecular repulsive and attractive potentials, we took a top-down approach, in which we iteratively optimized the parameters so that the CG MD simulations reproduced three, either physical or geometrical properties of lipid membranes. To guide this optimization process, we introduced a cost function:

$$Cost(\epsilon, \sigma, \omega) = \sum_{i=1}^3 \left( \frac{p_{i,sim}(\epsilon, \sigma, \omega) - p_{i,ref}}{p_{i,ref}} \right)^2 \quad (8)$$

301  
302  
303  
304  
305  
306  
307  
308  
309  
310

with  $p_{i,ref}$  representing the reference value for the  $i$ -th property and  $p_{i,sim}$  the  $i$ -th property calculated from the CG MD simulation that depends on the force field parameters,  $\epsilon$ ,  $\sigma$ , and  $\omega$ . For the three properties to match, we chose the area per lipid (APL), the hydrophobic thickness, and the order parameter in the bilayer membrane (**Fig. 3a-3c**). The reference values for the first two properties for the POPC lipid membrane were taken from experimental data reported by Kučerka, Nieh, and Katsaras<sup>49</sup>. In contrast, those for DPPC in the gel phase that were not available from experiments were taken from the all-atom MD structure ensemble. We calculated the reference value for the order parameter from the all-atom MD trajectories by mapping the atomic coordinates of lipid molecules to the CG beads and using the **Eq. (7)**.

311  
312  
313  
314  
315  
316  
317  
318  
319

We seek a set of parameters that minimize the cost function. Each evaluation of this cost function requires a new CG MD sampling with an updated set of parameters. Moreover, the calculation of the derivatives of the cost function with respect to the parameters is computationally very expensive. Thus, to minimize this function with respect to parameters, we used the Nelder-Mead method<sup>50</sup>, a gradient-free method in which a boundary enclosing a minimum in the parameter space is refined in each iteration step up to the desired precision. By selecting a suitable set of initial values, the convergence is achieved within some tenths of iterations (**Fig. 3d-3f**). Values for the optimized parameters for POPC and DPPC lipids are given in **Table 2**.

|            | POPC  | DPPC   |
|------------|-------|--------|
| $\epsilon$ | 0.416 | 0.464  |
| $\sigma_T$ | 7.111 | 6.900  |
| $\omega$   | 9.867 | 10.318 |

320  
321  
322  
323

**Table 2.** Coefficients for intermolecular interactions of POPC and DPPC.  $\epsilon$  is in kcal/mol, and  $\sigma$  and  $\omega$  are in Å.

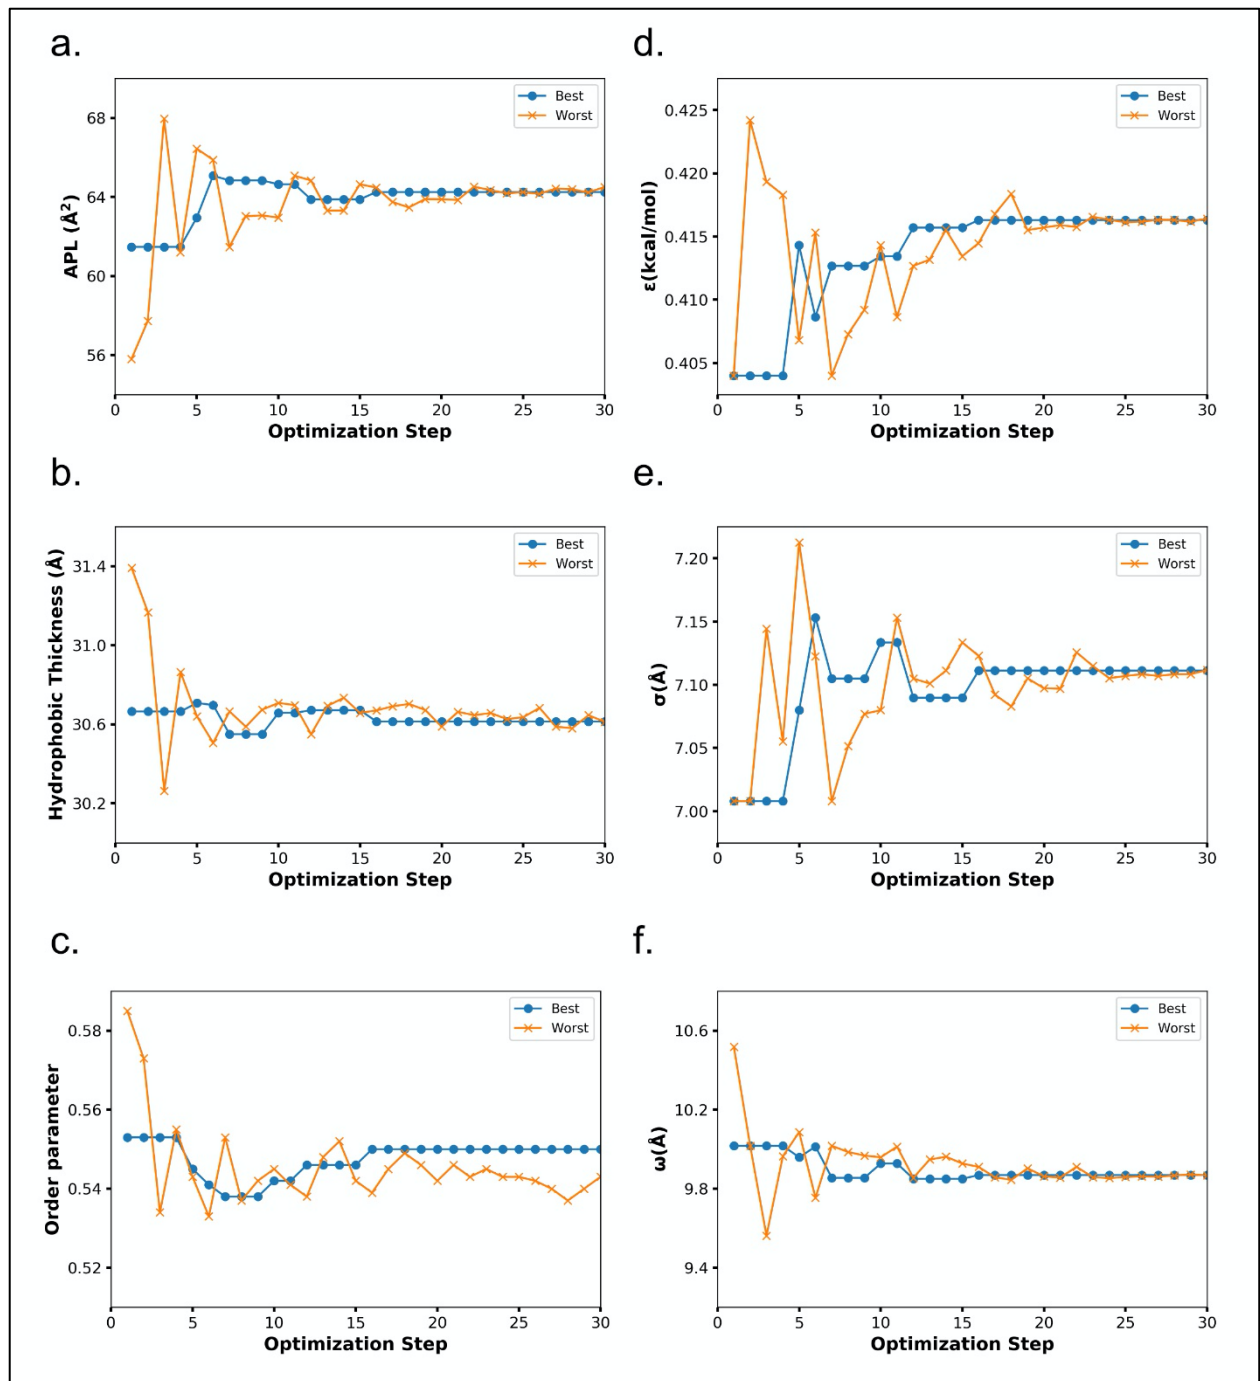

324

325 **Figure 3.** The parameter optimization process for the attractive and repulsive inter-lipid interactions for  
326 POPC using the Nelder-Mead method. (a)-(c) Values for the target properties for the best and the worst  
327 points of the boundary enclosing the minimum. As the optimization proceeds, both points approach  
328 each other. (d)-(f) Values for the coefficients of the attractive and repulsive interaction at each step of  
329 the optimization process.

330

### 331 Spontaneous membrane formation

332 Using the optimized set of parameters, we examined the spontaneous formation of lipid bilayer  
333 membranes with our CG force field, iSoLF. We prepared a system containing 200 POPC lipid

334 molecules randomly placed in a box following the procedure described in the Methods section. We  
335 fixed the size of the box so it would produce the equilibrium APL of POPC at 30 °C, that is,  $L_x$ ,  $L_y$ , and  
336  $L_z$  equal to 64, 64, and 80 Å, respectively. With this setup, the randomly positioned lipids spontaneously  
337 adopted a lipid bilayer conformation within  $10^4$  MD steps (**Fig. 4**). Once the lipid bilayer membrane  
338 was formed, we did not find any breakage of the membrane within the simulation time due to its stability.  
339 This spontaneous formation of the lipid bilayer membrane and no rupture of it suggest that the lipid  
340 bilayer is thermodynamically the most stable state with the current force field and under these  
341 conditions.

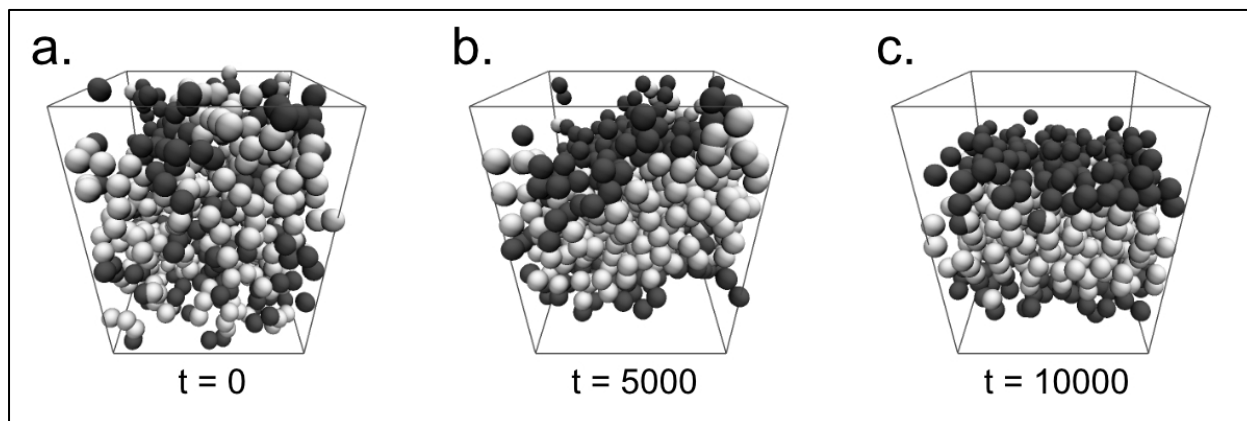

342  
343 **Figure 4.** Spontaneous lipid bilayer membrane formation. (a) Simulation of 200 POPC lipids at 30 °C,  
344 starting from a random configuration. (b) After 5000 CafeMol-time units, lipids begin to gather,  
345 forming a membrane-like conformation. (c) The lipids adopt a membrane conformation after 10000  
346 CafeMol-time units and maintain it without any breakage. Head and tail beads are in dark-gray and  
347 white, respectively.

348  
349 Two observations in the preliminary studies may be instructive. First, when we used the  
350 ensemble of zero surface tension in the xy-direction with variable box size, we noticed that CG MD  
351 simulations starting from random conformations were unstable, and the system box expanded  
352 indefinitely. This might be a technical difficulty specific to the implicit solvent nature of a system with  
353 variable box size. To avoid this issue, we decided to use a fixed box size, i.e., the NVT ensemble, in  
354 this simulation.

355 Another interesting observation in the preliminary simulation is on the stability of the formed  
356 lipid bilayer membrane. With the choice of  $\sigma_H = 0.85\sigma_T \sim 1.00\sigma_T$ , during the simulations starting from  
357 the lipid bilayer membrane configurations, pores appeared spontaneously in the membrane (**Fig. 5a** and  
358 **Fig. S2**). This behavior is consistent with an observation given in a document by the original author  
359 group.<sup>51</sup> When the box size is variable, the system occasionally expands, which results in a transient  
360 cavity formation in the membrane. The transiently formed cavity induces a tilt of the surrounding lipids,  
361 which increases the repulsive energy between head beads and tail beads at the cavity (akin to collisions).  
362 In order to reduce the repulsion, the system expands and forms a pore. Once the pore is formed in the

363 membrane, it is very stable, and the system is trapped in this conformation (**Fig. 5a**). We found that the  
364 stability of the pores depends on the ratio  $\sigma_H/\sigma_T$  between the head and tail beads (**Fig. S2**). With the  
365 choice of  $\sigma_H = 0.65\sigma_T$ , we did not see, even transiently, the pore formation. Moreover, after a pore is  
366 formed with the use of  $\sigma_H = 0.85\sigma_T$  relation, by changing the ratio to  $\sigma_H = 0.65\sigma_T$ , we could observe  
367 that the pore quickly disappeared (**Fig. 5b**). We concluded that a small enough radius of the head bead  
368 relative to the tail bead is necessary to make lipid bilayer membranes stable.

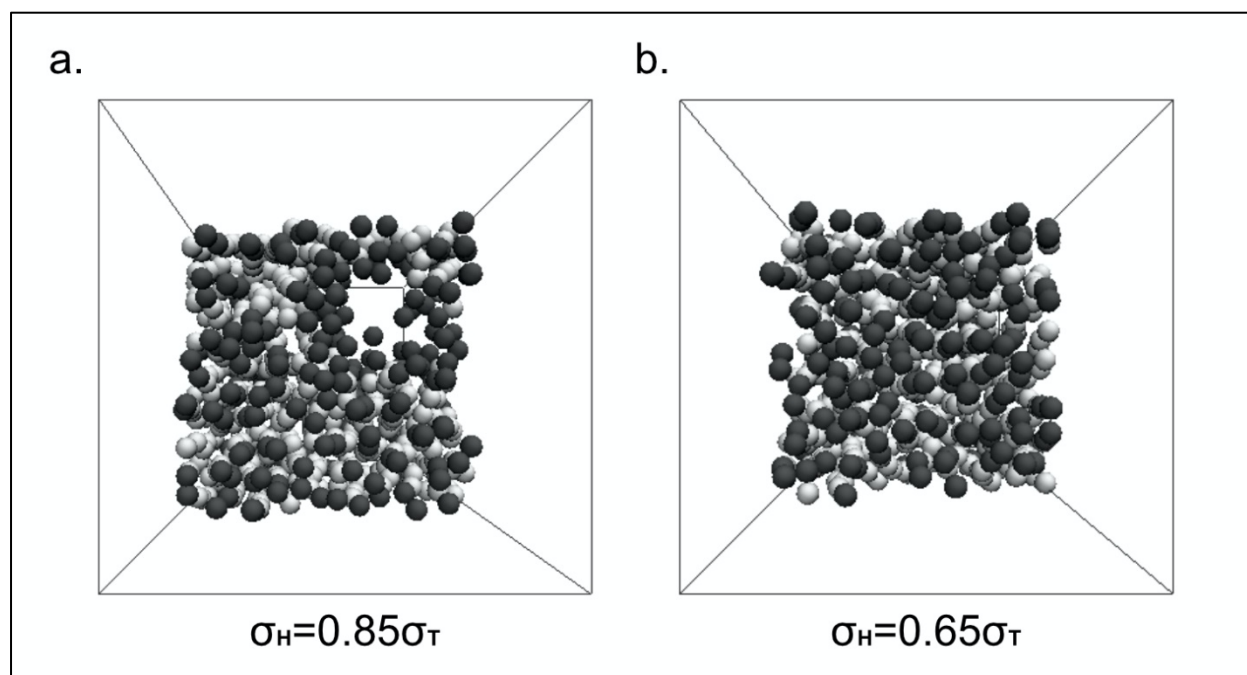

369 **Figure 5.** Pore formation in lipid membranes. Depending on the size ratio  $\sigma_H/\sigma_T$ , pores appear or  
370 disappear in the membrane conformations. (a) A simulation with a ratio of  $\sigma_H = 0.85\sigma_T$  results in the  
371 spontaneous formation of pores. (b) When the ratio is changed back to  $\sigma_H = 0.65\sigma_T$ , the pore  
372 disappears. Head and tail beads are in dark-gray and white, respectively.  
373

374

375

376

### 377 **Lateral diffusion**

378 We evaluated the lateral diffusion of POPC and DPPC lipids with the parameter set determined in the  
379 optimization process. To quantify the lateral diffusion, we computed the MSD in 2D at 30 °C (**Fig. 6a**).  
380 The MSD with respect to the time difference fits well to the straight line, suggesting a normal diffusion  
381 in 2D. A comparison of the slope of the MSD of the two lipids suggests that the pure POPC membrane  
382 is in a liquid phase, whereas the pure DPPC membrane is in a gel phase at 30 °C. To further support  
383 this, we calculated the diffusion coefficient of POPC and DPPC at different temperatures (**Fig. 6b**) and  
384 observed an apparent phase transition from gel to liquid phases around 25 °C for POPC and 95 °C for  
385 DPPC. This putative assignment of phases is further confirmed later by observing simultaneous changes  
386 in the area per lipid, the hydrophobic thickness, and the order parameter.

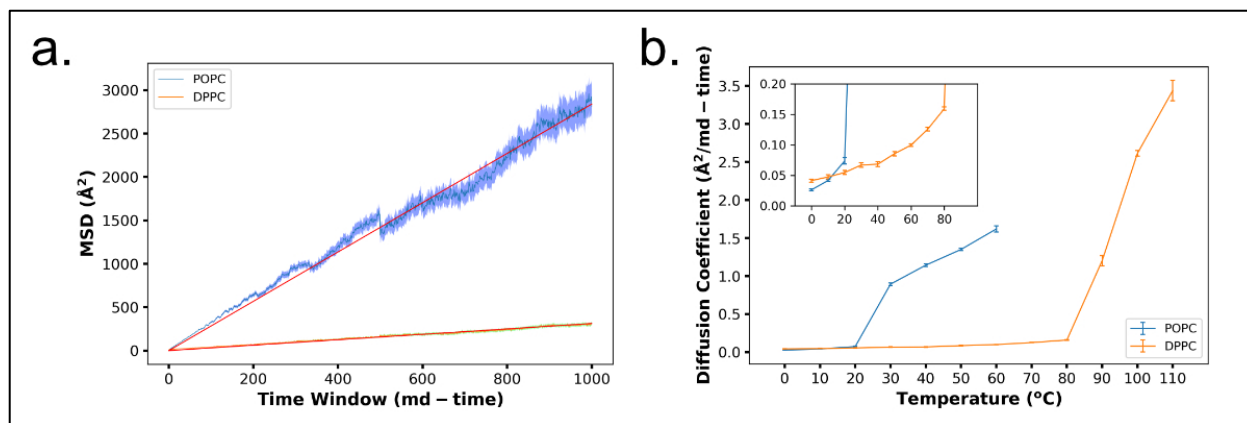

387

388 **Figure 6.** Lateral diffusion of POPC and DPPC lipids in membranes. (a) Mean square displacement  
389 (MSD) at a temperature of 30 °C for POPC (blue) and DPPC (orange). At this temperature, the POPC  
390 membrane shows a liquid phase, while the DPPC membrane remains in a gel phase. The red line  
391 corresponds to the fitted equation used to calculate the diffusion coefficient. (b) The 2D diffusion  
392 coefficient for POPC and DPPC lipids as a function of temperature. The model POPC and DPPC  
393 membranes exhibited an apparent phase transition around 25 °C and 95 °C, respectively. The subplot  
394 shows the lower section of the main plot.

395 We also used the MSD in 2D for a rough comparison of the running time of our coarse-grained  
396 lipid model with a standard all-atom model. Using 1 CPU core for both all-atom and coarse-grained  
397 simulations, we calculated the MSDs (**Fig. S3**). For the all-atom simulation, an MSD of 0.174 nm<sup>2</sup>  
398 was obtained in about 8 hours 47 minutes. On the other hand, with our CG model, an MSD of  
399 36.7 nm<sup>2</sup> was obtained in about 21 minutes. Assuming the MSD increases linearly in time, except for  
400 a very short time regime, we obtained a speed-up factor of ~5000 relative to the all-atom model. To get  
401 an MSD value comparable to our coarse-grained model, the all-atom model would need about 2 months  
402 and 17 days using the same resources.

403

## 404 Vesicle dynamics

405 Next, we performed a CG MD simulation of a vesicle made of POPC lipids. For this, we prepared a  
406 small unilamellar vesicle (SUV) with a diameter of ~30 nm (see the Method, **Fig. 7a**). Preliminary tests  
407 suggested that starting the CG MD simulations at a room temperature causes an unstable behavior of  
408 the vesicle due perhaps to a poor setup of the initial structure. To avoid this instability, we started from  
409 a temperature of 0K = - 273 °C and then gradually heated the system until 30 °C. During this heating  
410 process, some lipid molecules in the outer leaflet left the vesicle, but without affecting the overall  
411 vesicle shape. Once the system reached 30 °C (**Fig. 7b**), we removed lipid molecules that were  
412 dissociated from the vesicle during the heating up process and, after that, conducted the production run.  
413 During this process, we evaluated the stability of the vesicle by monitoring the radius of the sphere that  
414 best fitted the vesicle as a function of time (**Fig. 7c**). Also, by visual inspection, we checked that the  
415 vesicle did not present any pore and that the unilamellar structure was maintained during the simulation.

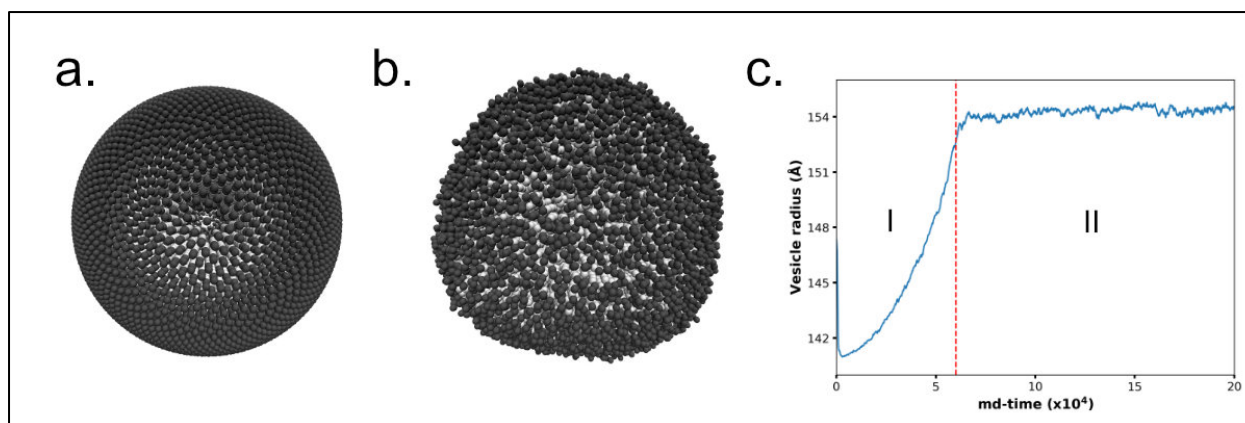

416

417 **Figure 7.** A CG MD simulation of a vesicle made of POPC lipids. (a) Initial conformation of the vesicle  
418 generated with the Fibonacci lattice method. (b) Vesicle after equilibrating the system at room  
419 temperature. (c) The radius of the best fit sphere on the vesicle during the equilibration (I) and  
420 production (II) run. In the first stage, the vesicle was heated up from 0 K = -273 °C to 30 °C, and in the  
421 second stage, the vesicle was kept at a constant temperature of 30 °C. Head and tail beads are in dark-  
422 gray and white, respectively.

423

#### 424 **Temperature dependence**

425 The parameterization of our CG lipid force fields for POPC and DPPC was performed at 30 °C. At this  
426 temperature, the simulations closely reproduced the reference properties, and the POPC and DPPC  
427 membranes were apparently in liquid and gel phases, respectively (**Fig. 3** and **Fig. 6b**). Here, we  
428 examine if our model can reproduce the temperature dependence of these quantities. Simulating POPC  
429 and DPPC lipid membranes at different temperatures from 0 °C to 110 °C, we calculated the area per  
430 lipid (APL), the hydrophobic thickness, the order parameter (**Fig. 8**), and the lateral diffusion coefficient  
431 (**Fig. 6b**) of single-component lipid bilayers.



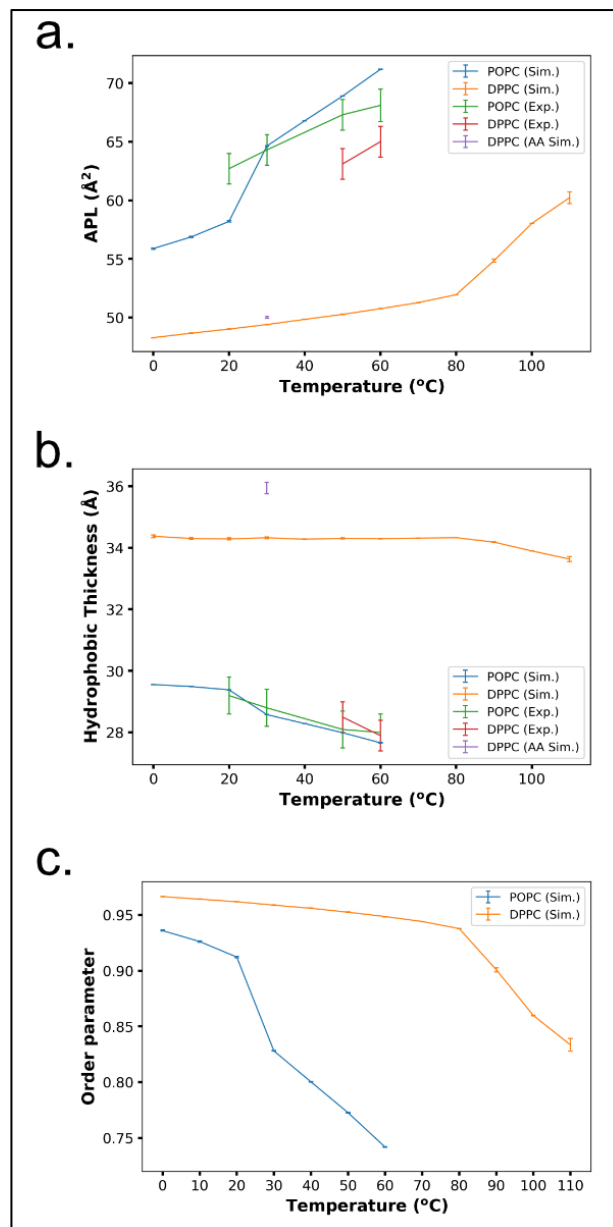

432

433 **Figure 8.** Temperature dependence of membrane properties. Comparison of the temperature  
434 dependence of geometric properties between CG simulations and experiments for (a) the area per lipid  
435 (APL), (b) the hydrophobic thickness, (c) and the order parameter. The experimental data are available  
436 only in the liquid phase for POPC. Purple squares represent the values calculated from all-atom MD  
437 simulations of DPPC membranes. The maximum errors are  $\pm 0.04$  and  $\pm 0.009$  for the APL,  $\pm 0.01$  and  
438  $\pm 0.004$  for the hydrophobic thickness, and  $\pm 7.1 \times 10^{-4}$  and  $\pm 0.006$  for the order parameter of POPC  
439 and DPPC, respectively.

440

441 We observed a characteristic change in the area per lipid, the hydrophobic thickness, and the  
442 order parameter nearly at the same temperature as that in the lateral diffusion coefficient, both for POPC  
443 and DPPC (**Fig. 8**), giving further evidence of a transition from the gel phase to the liquid disordered  
444 phase<sup>52-54</sup>. For the pure POPC membrane, we found that both the area per lipid and the hydrophobic

445 thickness of the CG model membrane stayed correlated with the experimental values at temperatures  
446 within the range of 30 - 60 °C. Below 30 °C, however, we observed the phase transition around 25 °C  
447 in the CG model (**Fig. 3** and **Fig. 6b**), whereas, experimentally, the phase transition temperature of the  
448 POPC membrane is reported as -2 °C. This shows that the transition temperature was not correctly  
449 reproduced in the current parametrization.

450 DPPC lipid membranes have a gel-liquid phase transition temperature at 41 °C, experimentally.  
451 In the current parametrization, we took the reference values at 30 °C from an all-atom MD simulation  
452 ensemble, in which DPPC lipid was in the gel phase. With our CG lipid force field, the DPPC lipid  
453 membrane showed a sharp gel-liquid phase transition at around 95 °C (**Fig. 6b**). Thus, the phase  
454 transition temperature was also not accurately reproduced. At 50-60 °C, our estimates of the area per  
455 lipid and the hydrophobic thickness from CG MD in the gel phase deviates from experimental data  
456 from the liquid phase (**Fig. 8**).

457 Overall, we summarize that, with the current force field of lipids, we can reproduce major  
458 geometrical properties of pure POPC and pure DPPC membranes at 30°C at which we calibrated the  
459 parameters, as well as the temperature dependence within the liquid phase. Yet, we cannot predict the  
460 phase transition temperature between the gel and liquid disordered phases.

461

## 462 **Two-component membrane system**

463 Finally, we tested the behavior of a membrane composed of POPC and DPPC. We simulated a  
464 membrane consisting of 256 POPCs and 256 DPPCs at 50 °C. We prepared the initial configuration at  
465 which the POPC lipid molecules were localized in the half area of the membrane, and the DPPC lipids  
466 were localized in the other half (**Fig. 9a**). In an early stage of the simulation, we confirmed that two  
467 different phases, the liquid phase in the POPC region and the gel phases in the DPPC region, coexist  
468 (**Fig. 10a**).

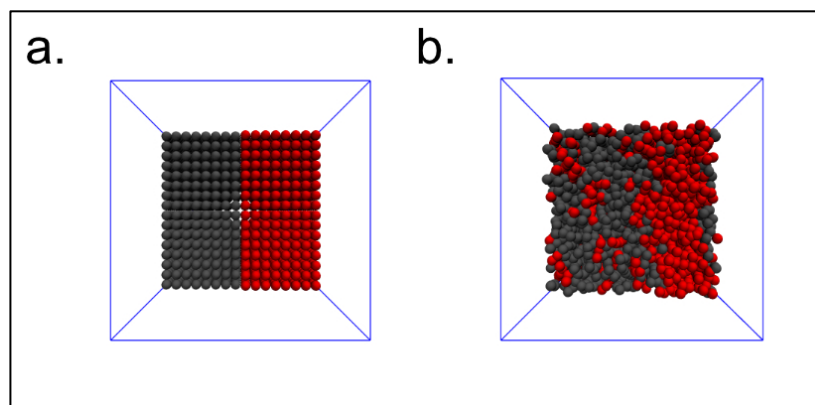

469

470 **Figure 9.** Simulation of a system composed of POPC and DPPC with a ratio of 1:1 at 30 °C. (a) Initial  
471 configuration of the binary system. Grey and red molecules represent POPC and DPPC lipids,  
472 respectively. (b) Some DPPC lipids in a gel phase diffuse to the POPC phase. At the boundary, POPC  
473 lipids directly interacting with DPPC lipids transitioned to a gel phase.

474  
475  
476  
477  
478  
479  
480  
481  
482

As the system evolved, we observed some exchanges in lipids around the interface between the DPPC and POPC phases. We found that the DPPC lipids that moved to the liquid disordered phase exhibited a faster diffusion, whereas the POPC lipids that moved to the gel phase had almost zero diffusion. Consistently, the order parameter suggests that DPPC lipids exhibit liquid disordered-like behavior when they are locally in a low ratio to POPC lipids, despite being at a temperature that corresponds to the gel phase of pure DPPC (**Fig. 10b**). In the same way, POPC lipids exhibited a gel-like behavior when they are locally in a lower ratio to DPPC lipids.

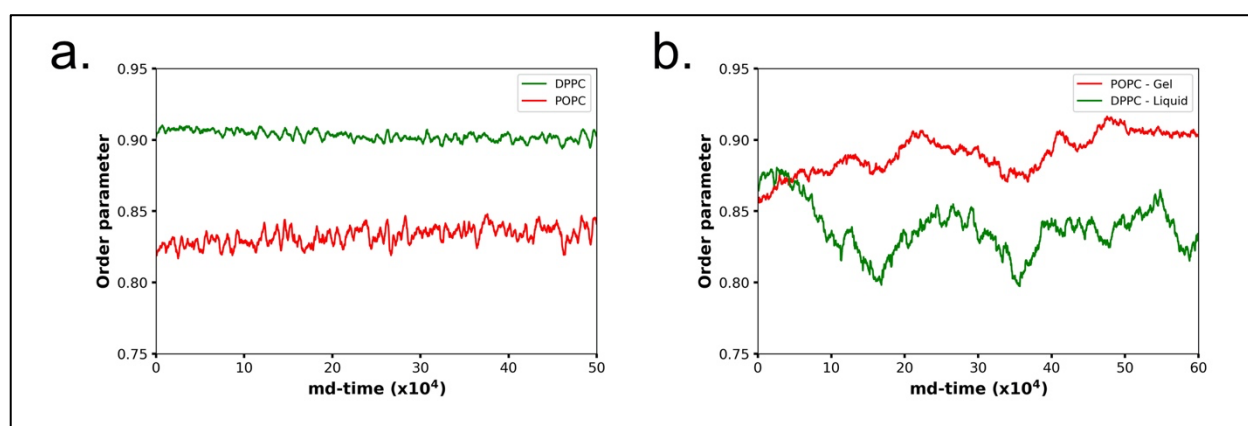

483  
484 **Figure 10.** Order parameter for POPC and DPPC in a two-component membrane. (a) Time series of  
485 the average order parameter for POPC and DPPC in a two-component membrane. (b) Time series of  
486 the order parameter of two specific lipids. The red line shows the order parameter of a POPC lipid that  
487 diffuses into the DPPC gel phase, and the green line the order parameter of a DPPC lipid that diffuses  
488 into the POPC liquid phase.

489

## 490 Conclusions

491 In this study, we extended the three-bead lipid model developed by Cooke, Kremer, and Deserno into  
492 a five-bead model. We parametrized it for the two phospholipids, one unsaturated, POPC, and the other  
493 saturated, DPPC lipids. The developed model, iSoLF, reproduced the area per lipid, the hydrophobic  
494 thickness, and the phase behaviors of the target phospholipids at 30 °C. Also, the model membranes of  
495 POPC and DPPC were in liquid disordered and gel phases, respectively, in accordance with experiments.  
496 We further examined the spontaneous formation of a lipid bilayer, the temperature dependence of  
497 physical properties, the vesicle dynamics, and the POPC/DPPC two-component membrane dynamics  
498 using the parameterized CG lipid model.

499 While our CG model membranes, both for POPC and DPPC lipids, reproduced geometric and  
500 physical properties estimated from experiments or all-atom models at 30 °C where we calibrated the  
501 parameters, the CG model did not reproduce the gel-liquid phase transition temperature correctly.  
502 Probably, we can perform finer tuning of the parameters targeting the phase transition temperature for

503 each target phospholipid. For the two-component systems made of POPC and DPPC, we only tested a  
504 small patch of a membrane with 1:1 composition in this work. Probably, we need a more comprehensive  
505 examination of longer-time simulations of larger systems with different compositions. These  
506 refinements are left for future studies.

507 Since our aim here is to develop a CG lipid model compatible with the  $C\alpha$ -protein model, our  
508 next step is to model lipid-protein interactions. Therein, from a physicochemical point of view, the  
509 excluded volume, hydrophobic interactions, and electrostatic interactions need to be modeled. These  
510 developments are now underway. Once combined with standard  $C\alpha$  protein models, the iSoLF model  
511 will be a powerful tool to simulate large biological membrane systems made of lipids and proteins. The  
512 iSoLF model will be available in the upcoming release of CafeMol.

513

## 514 **Data Availability**

515 The data that support the findings of this study are available from the corresponding author upon  
516 reasonable request.

517

## 518 **Author's Contribution**

519 All authors contributed equally to this work.

520

## 521 **Acknowledgment**

522 We thank Hiroshi Noguchi for many helpful discussions, Giovanni Brandani, for his valuable insights,  
523 and Toru Niina, Suguru Kato, and Masahiro Shimizu for their help when implementing the model in  
524 CafeMol. D.U.L.T. acknowledges the Japanese Government Scholarship from the Ministry of  
525 Education, Culture, Sports, Science, and Technology (MEXT). The study was supported partly by  
526 MEXT as "Priority Issue on Post-K computer" (ST), by the RIKEN Pioneering Project "Dynamical  
527 Structural Biology" (ST) and by the Japan Science and Technology Agency (JST) grant JPMJCR1762  
528 (ST).

529

## 530 **References**

- 531 1. J.L. Klepeis, K. Lindorff-Larsen, R.O. Dror, and D.E. Shaw, *Curr. Opin. Struct. Biol.* **19**, 120  
532 (2009).
- 533 2. M.C. Zwier and L.T. Chong, *Curr. Opin. Pharmacol.* **10**, 745 (2010).
- 534 3. D.J. Huggins, P.C. Biggin, M.A. Dämgen, J.W. Essex, S.A. Harris, R.H. Henchman, S.  
535 Khalid, A. Kuzmanic, C.A. Laughton, J. Michel, A.J. Mulholland, E. Rosta, M.S.P. Sansom,  
536 and M.W. van der Kamp, *Wiley Interdiscip. Rev. Comput. Mol. Sci.* **9**, 1 (2019).
- 537 4. S. Takada, *Curr. Opin. Struct. Biol.* **22**, 130 (2012).
- 538 5. S. V. Bennun, M.I. Hoopes, C. Xing, and R. Faller, *Chem. Phys. Lipids* **159**, 59 (2009).
- 539 6. S. Kmiecik, D. Gront, M. Kolinski, L. Wieteska, A.E. Dawid, and A. Kolinski, *Chem. Rev.*  
540 **116**, 7898 (2016).
- 541 7. J. Kleinjung and F. Fraternali, *Curr. Opin. Struct. Biol.* **25**, 126 (2014).
- 542 8. R. Goetz and R. Lipowsky, *J. Chem. Phys.* **108**, 7397 (1998).
- 543 9. H. Noguchi and M. Takasu, *J. Chem. Phys.* **115**, 9547 (2001).
- 544 10. I.R. Cooke, K. Kremer, and M. Deserno, *Phys. Rev. E - Stat. Nonlinear, Soft Matter Phys.* **72**,  
545 2 (2005).
- 546 11. S.J. Marrink, A.H. De Vries, and A.E. Mark, *J. Phys. Chem. B* **108**, 750 (2004).
- 547 12. W. Shinoda, R. Devane, and M.L. Klein, *Mol. Simul.* **33**, 27 (2007).
- 548 13. L. Lu and G.A. Voth, *J. Phys. Chem. B* **113**, 1501 (2009).
- 549 14. A.P. Lyubartsev, *Eur. Biophys. J.* **35**, 53 (2005).
- 550 15. A.J. Sodt and T. Head-Gordon, *J. Chem. Phys.* **132**, (2010).
- 551 16. J.C. Shelley, M.Y. Shelley, R.C. Reeder, S. Bandyopadhyay, P.B. Moore, and M.L. Klein, *J.*  
552 *Phys. Chem. B* **105**, 9785 (2001).
- 553 17. E.M. Curtis and C.K. Hall, *J. Phys. Chem. B* **117**, 5019 (2013).
- 554 18. E.E. Barrera, E.N. Frigini, R.D. Porasso, and S. Pantano, *J. Mol. Model.* **23**, 2 (2017).
- 555 19. H. Koldsø, D. Shorthouse, J. Hélie, and M.S.P. Sansom, *PLoS Comput. Biol.* **10**, (2014).
- 556 20. K. Koshiyama and S. Wada, *Sci. Rep.* **6**, 1 (2016).

- 557 21. V. Corradi, E. Mendez-Villuendas, H.I. Ingólfsson, R.X. Gu, I. Siuda, M.N. Melo, A.  
558 Moussatova, L.J. Degagné, B.I. Sejdiu, G. Singh, T.A. Wassenaar, K. Delgado Magnero, S.J.  
559 Marrink, and D.P. Tieleman, *ACS Cent. Sci.* **4**, 709 (2018).
- 560 22. M. Xue, L. Cheng, I. Faustino, W. Guo, and S.J. Marrink, *Biophys. J.* **115**, 494 (2018).
- 561 23. C. Arnarez, J.J. Uusitalo, M.F. Masman, H.I. Ingólfsson, D.H. De Jong, M.N. Melo, X.  
562 Periole, A.H. De Vries, and S.J. Marrink, *J. Chem. Theory Comput.* **11**, 260 (2015).
- 563 24. C. Clementi, H. Nymeyer, and J.N. Onuchic, *J. Mol. Biol.* **298**, 937 (2000).
- 564 25. T.X. Hoang and M. Cieplak, *J. Chem. Phys.* **112**, 6851 (2000).
- 565 26. N. Koga and S. Takada, *J. Mol. Biol.* **313**, 171 (2001).
- 566 27. A.R. Atilgan, S.R. Durell, R.L. Jernigan, M.C. Demirel, O. Keskin, and I. Bahar, *Biophys. J.*  
567 **80**, 505 (2001).
- 568 28. J. Karanicolas and C.L. Brooks, *Protein Sci.* **11**, 2351 (2009).
- 569 29. G. Brannigan, P.F. Phillips, and F.L.H. Brown, *Phys. Rev. E - Stat. Nonlinear, Soft Matter*  
570 *Phys.* **72**, 4 (2005).
- 571 30. T. Sintès and A. Baumgärtner, *J. Chem. Phys.* **106**, 5744 (1997).
- 572 31. F. Schmid, D. Düchs, O. Lenz, and B. West, *Comput. Phys. Commun.* **177**, 168 (2007).
- 573 32. M. Kranenburg, M. Venturoli, and B. Smit, *J. Phys. Chem. B* **107**, 11491 (2003).
- 574 33. A. Srivastava and G.A. Voth, *J. Chem. Theory Comput.* **9**, 750 (2013).
- 575 34. A.J. Pak, T. Dannenhoffer-Lafage, J.J. Madsen, and G.A. Voth, *J. Chem. Theory Comput.* **15**,  
576 2087 (2019).
- 577 35. J.D. Revalee, M. Laradji, and P.B. Sunil Kumar, *J. Chem. Phys.* **128**, (2008).
- 578 36. S.J. Attwood, Y. Choi, and Z. Leonenko, *Int. J. Mol. Sci.* **14**, 3514 (2013).
- 579 37. S. Leekumjorn and A.K. Sum, *J. Phys. Chem. B* **111**, 6026 (2007).
- 580 38. H. Kenzaki, N. Koga, N. Hori, R. Kanada, W. Li, K.I. Okazaki, X.Q. Yao, and S. Takada, J.  
581 *Chem. Theory Comput.* **7**, 1979 (2011).
- 582 39. X. Gao, J. Fang, and H. Wang, *J. Chem. Phys.* **144**, (2016).
- 583 40. Extreme learning. <http://extremelearning.com.au/evenly-distributing-points-on-a-sphere/>  
584 (accessed Oct 1, 2019)

- 585 41. M.J. Abraham, T. Murtola, R. Schulz, S. Páll, J.C. Smith, B. Hess, and E. Lindah, SoftwareX  
586 1–2, 19 (2015).
- 587 42. J.P.M. Jämbeck and A.P. Lyubartsev, J. Phys. Chem. B **116**, 3164 (2012).
- 588 43. J.P.M. Jämbeck and A.P. Lyubartsev, J. Chem. Theory Comput. **8**, 2938 (2012).
- 589 44. W.L. Jorgensen, J. Chandrasekhar, J.D. Madura, R.W. Impey, and M.L. Klein, J. Chem. Phys.  
590 **79**, 926 (1983).
- 591 45. SLipids. <http://www.fos.su.se/~sasha/SLipids/Downloads.html> (accessed Jun 1, 2019)
- 592 46. W.J. Allen, J.A. Lemkul, and D.R. Bevan, J. Comput. Chem. **32**, 174 (2012).
- 593 47. G. Pranami and M.H. Lamm, J. Chem. Theory Comput. **11**, 4586 (2015).
- 594 48. V. Agrawal, G. Arya, and J. Oswald, Macromolecules **47**, 3378 (2014).
- 595 49. N. Kučerka, M.P. Nieh, and J. Katsaras, Biochim. Biophys. Acta - Biomembr. **1808**, 2761  
596 (2011).
- 597 50. J.A. Nelder and R. Mead, Comput. J. **7**, 308 (1965).
- 598 51. T. Bereau, M. Hu, P. Diggins, and M. Deserno, **771**, 1 (2011).
- 599 52. M. Kranenburg and B. Smit, J. Phys. Chem. B **109**, 6553 (2005).
- 600 53. Q. Waheed, R. Tjörnhammar, and O. Edholm, Biophys. J. **103**, 2125 (2012).
- 601 54. Y. Wang, P. Gkeka, J.E. Fuchs, K.R. Liedl, and Z. Cournia, Biochim. Biophys. Acta -  
602 Biomembr. **1858**, 2846 (2016).
- 603  
604  
605  
606  
607  
608  
609  
610  
611  
612  
613  
614  
615

616 **Supporting Information for Coarse-grained implicit solvent lipid**  
617 **force field with a compatible resolution to the  $\alpha$  protein**  
618 **representation**

619

620 Diego Ugarte La Torre<sup>1</sup> and Shoji Takada<sup>1</sup>

621 <sup>1</sup>Department of Biophysics, Graduate School of Science, Kyoto University, Kyoto, Japan

622

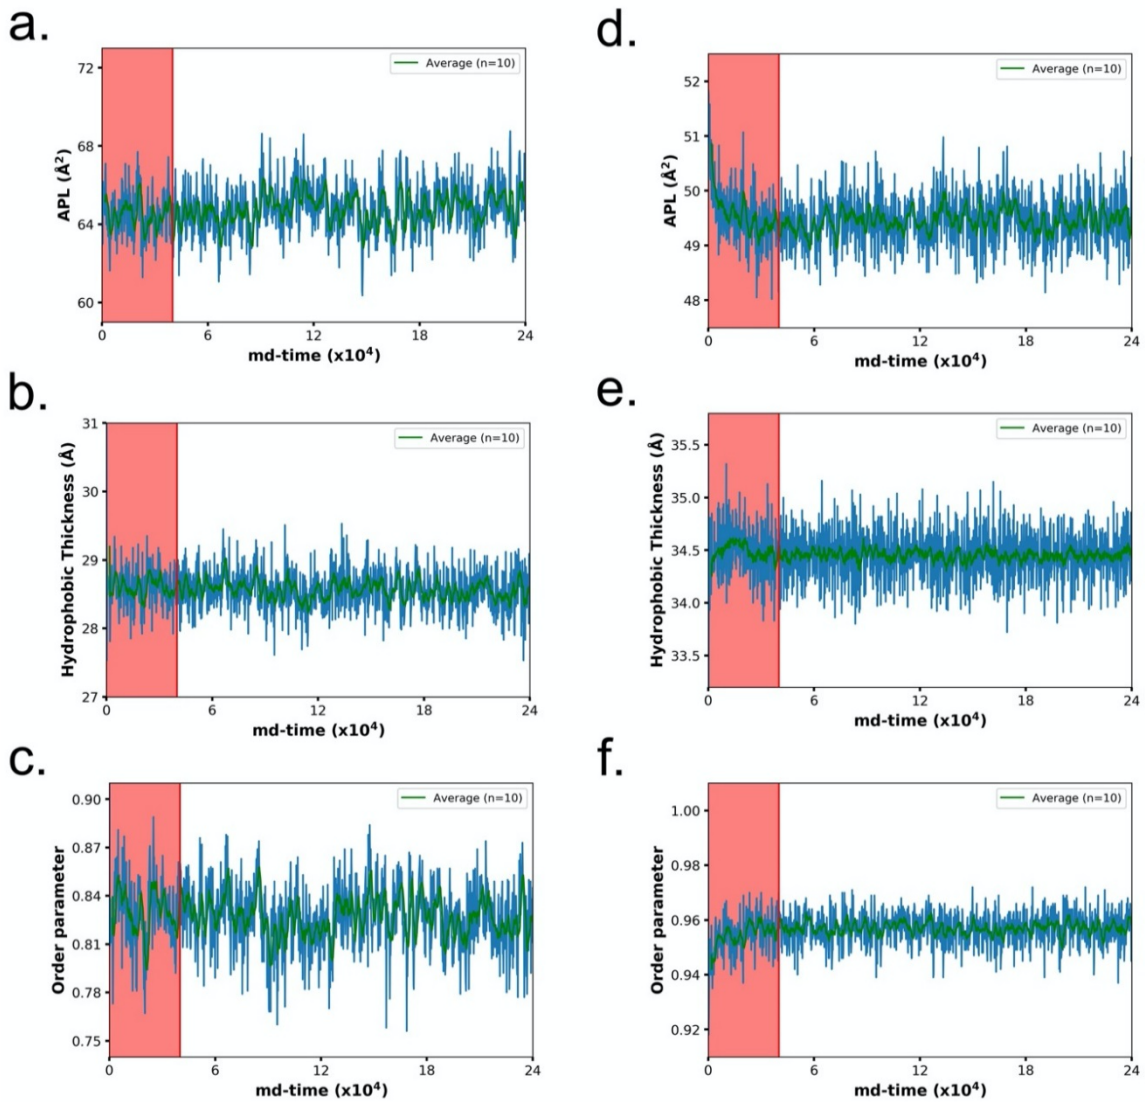

623

624

625 **Figure S1.** Time series for POPC and DPPC. Time series obtained with our coarse-grained lipid model  
626 following the protocol described in the Methods section of the main text. The plots show the APL,  
627 Hydrophobic Thickness, and Order parameter for POPC (a-c) and DPPC (d-f). The red zone in each  
628 plot represents the portion of the trajectory that was discarded, and the green line represents the running  
629 average for the 10 last points.

630

631

632

633



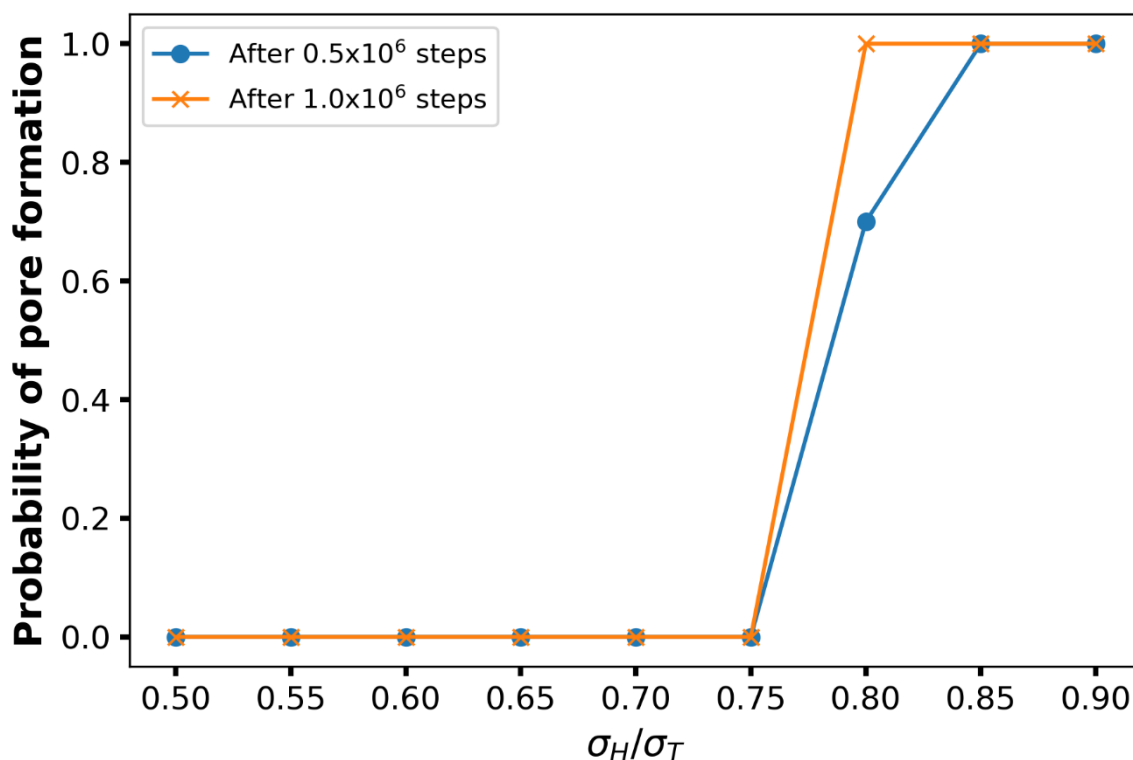

634  
635  
636  
637  
638  
639  
640  
641

**Figure S2.** Probability of pore formation for POPC. For each ratio, 20 simulations were performed from which the probability was determined by counting the number of membranes presenting a pore. No pores were formed when the ratio of  $\sigma_H/\sigma_T$  is 0.75 or lower. At a ratio of 0.8, a pore was formed in 14 out of 20 membranes during the first  $0.5 \times 10^6$  simulation steps (blue line), and after  $1.0 \times 10^6$  simulations steps, all the membranes presented a pore.

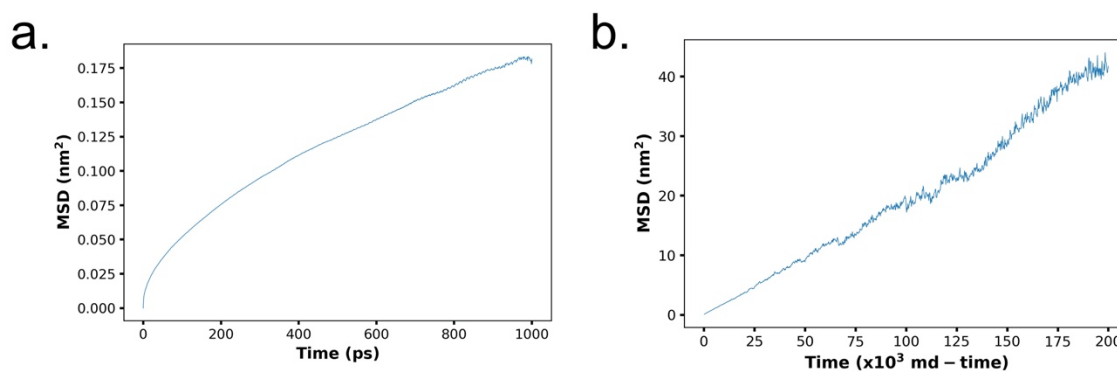

642  
643  
644  
645  
646  
647

**Figure S3.** Lateral diffusion of POPC for one sample trajectory. **(a)** MSD obtained with the Slipids all-atom model. **(b)** MSD obtained with our iSoLF coarse-grained model. Both simulations consisted of 128 POPC lipids at 303K, as described in the Methods section of the main text.
